# Supplementary material for: CXCL12-ACKR3 Signaling Drives Fibrosis and Inflammation in Frozen Shoulder: A Single-Cell Guided Therapeutic Discovery
Source: Research Square preprint supplement (doi:10.21203/rs.3.rs-6289785/v1), 2025-04-10
Supplement: Supplementary file 1 [file 027e57176623edd12f4b76c6.xlsx]

## Sheet: Sheet1
Reagent information
Reagent	Application (Species/Scenario)	Dilution	Manufacturer	Catalog Number
Collagenase type II	Enzymatic digestion of human synovial tissue for single-cell RNA sequencing	2 mg/mL	Gibco	17101015
Elastase	Enzymatic digestion of human synovial tissue for single-cell RNA sequencing	1 mg/mL	MKbio	MX1010
DNase I	Enzymatic digestion of human synovial tissue for single-cell RNA sequencing	0.05 mg/mL	MKbio	MF0402
Trypsin	Complete digestion of human synovial tissue post-collagenase treatment	2.5 mg/mL	Gibco	15090046
Red Blood Cell Lysis Solution	Removal of red blood cells from human synovial cell suspension	-	MACS	130-094-183
Liberase TM	Digestion of human synovial tissue for fibroblast isolation and flow cytometry	0.0125 mg/mL	Roche	5401119001
Fetal Bovine Serum (FBS)	Supplement for human fibroblast culture medium	10%	Procell	PM150210
Penicillin/Streptomycin	Supplement for human fibroblast culture medium	1%	Procell	64210, PB180120
Human recombinant CXCL12 protein	Stimulation of human FS-derived fibroblasts in vitro	50 ng/mL	Abclonal	RP01637
RIPA lysis buffer	Protein extraction from human fibroblasts for Western blot	-	Yeasenbio	20101ES
Protease inhibitor cocktail	Protein extraction from human fibroblasts for Western blot	2%	Yeasenbio	20138ES
Loading buffer	Denaturation of protein lysates from human fibroblasts	-	Yeasenbio	20315ES
6% and 10% Tris gels	Western bolt	-	FDbid	FD341, FD345
PVDF membranes	Western bolt	-	Millipore	IPFL00010
MMP1 antibody (WB)	Western blot detection of MMP1 in human fibroblasts	1:10000	Abclonal	A22080
MMP3 antibody (WB)	Western blot detection of MMP3 in human fibroblasts	1:1000	Abclonal	A11418
COL3A1 antibody (WB)	Western blot detection of COL3A1 in human fibroblasts	1:1000	Abclonal	A0817
FN1 antibody (WB)	Western blot detection of FN1 in human fibroblasts	1:1000	Abclonal	A23830
ACKR3 antibody (WB)	Western blot detection of ACKR3 in human fibroblasts	1:10000	Abcam	AB138509
GAPDH antibody	Western blot loading control in human fibroblasts	1:2000	Servicebio	GB15004
ACTIN antibody	Western blot loading control in human fibroblasts	1:2000	Servicebio	GB15003
α-TUBULIN antibody	Western blot loading control in human fibroblasts	1:4000	Servicebio	GB15201
HRP-conjugated secondary antibody	Western blot detection of proteins in human fibroblasts; immunohistochemical analysis of human synovial tissues; Immunofluorescence detection in rat tissues	1:10000 (WB); 1:200 (IHC); 1:200(mIHC)	Servicebio	GB23303
Hematoxylin-eosin (H&E) HD constant dye kit	Histological staining of human and rat synovial tissues	-	Servicebio	G1076
Masson dye solution set	Histological staining of human synovial tissues	-	Servicebio	G1006
CXCL12 antibody (IHC huamn)	Immunohistochemical detection of CXCL12 in human synovial tissues	1:250	Proteintech	17402-1-AP
C7 antibody	Flow cytometry of human synovial cells	1:100	ThermoFisher	MA5-34943
Alexa Fluor 488-conjugated antibody (FC)	Flow cytometry of human synovial cells	1:1000	ThermoFisher	A11001
APC anti-human FAP antibody	Flow cytometry of human synovial cells	1:100	R&D Systems	FAB3715A
APC/Cyanine7 anti-human CD257 antibody	Flow cytometry of human synovial cells	1:100	Biolegend	366511
BB700 anti-human CD31 antibody	Flow cytometry of human synovial cells	1:100	BD	566564
Alexa Fluor 405 anti-human CXCL12 antibody	Flow cytometry of human synovial cells	1:100	R&D Systems	FAB350V
Fixation/Permeabilization Kit	Intracellular staining of human synovial cells for flow cytometry	-	BD	554714
7-AAD	Exclusion of dead cells in flow cytometry	5ul/test	BD	559925
Fixable Viability Dye eFluor™ 506	Exclusion of dead cells in flow cytometry	1:1000	ThermoFisher	65-0866-14
CXCR4 antibody	Flow cytometry detection of CXCR4 in human cultured fibroblasts	1:50	Bioss	bs-1011R
PE-conjugated secondary antibody	Flow cytometry detection of CXCR4 in human cultured fibroblasts	1:1,000	Bioss	bs-0295G-PE
CXCL12 ELISA kit	Quantification of CXCL12 in human fibroblast supernatants	-	Abclonal	RK00266
CXCL12 neutralization agent (LIT-927)	Neutralization of CXCL12 in human fibroblasts and rat model	100 ng/mL (human cells); 1mg/kg (rat)	MCE	HY-112709
Cas9 protein	Electroporation-mediated ACKR3 knockout in human fibroblasts	1.5 μM	ThermoFisher	A36499
COL3A1 antibody (IF)	Immunofluorescence detection of COL3A1 in human cells and rat tissues	1:1000 (human), 1:1000 (rat)	Servicebio	GB111629
FN1 antibody (IF)	Immunofluorescence detection of FN1 in human cells and rat tissues	1:2000 (human), 1:2000 (rat)	Servicebio	GB114491
DAPI solution	Nuclear counterstaining in human and rat immunofluorescence	-	Servicebio	G1012
TSA Fluorescence Double Staining Kit	Immunofluorescence double-labeling of ACKR3 and CXCL12 in rat tissues	-	Servicebio	G1226
TRIzol reagent	RNA extraction from human fibroblasts for transcriptome sequencing	-	Takara	9108
Alexa Fluor 488-conjugated secondary antibody (IF)	Immunofluorescence detection in human cells and rat tissues	1:400 (human), 1:400 (rat)	Servicebio	GB25303
MMP1 antibody (IF)	Immunofluorescence detection of MMP1 in rat tissues	1:400	Proteintech	10371-2-AP
MMP3 antibody (IF)	Immunofluorescence detection of MMP3 in rat tissues	1:400	Servicebio	GB11131
ACKR3 antibody (mIHC)	Immunofluorescence detection of ACKR3 in rat tissues	1:1000	Abclonal	A12712
CXCL12 antibody (mIHC)	Immunofluorescence detection of CXCL12 in rat tissues	1:1000	Abclonal	A18225
