# Supplementary material for: CXCL12-ACKR3 Signaling Drives Fibrosis and Inflammation in Frozen Shoulder: A Single-Cell Guided Therapeutic Discovery
Source: Research Square preprint supplement (doi:10.21203/rs.3.rs-6289785/v1), 2025-04-10
Supplement: Supplementary file 1 [file 59c6fc24a51fcc312c2d7cc9.pdf]

1  
2  
3  
4  
5  
6  
7  
8  
9  
10  
11  
12  
13  
14  
15

**Supplementary Materials for**

**CXCL12-ACKR3 Signaling Drives Fibrosis and Inflammation in Frozen Shoulder: A  
Single-Cell Guided Therapeutic Discovery**

**Hongpu He et al.**

**\*Corresponding author. Jian Xu. Email: 0022029@zju.edu.cn**

**This file includes:**

**Figs. S1 to S14**

**Tables S1 to S6**

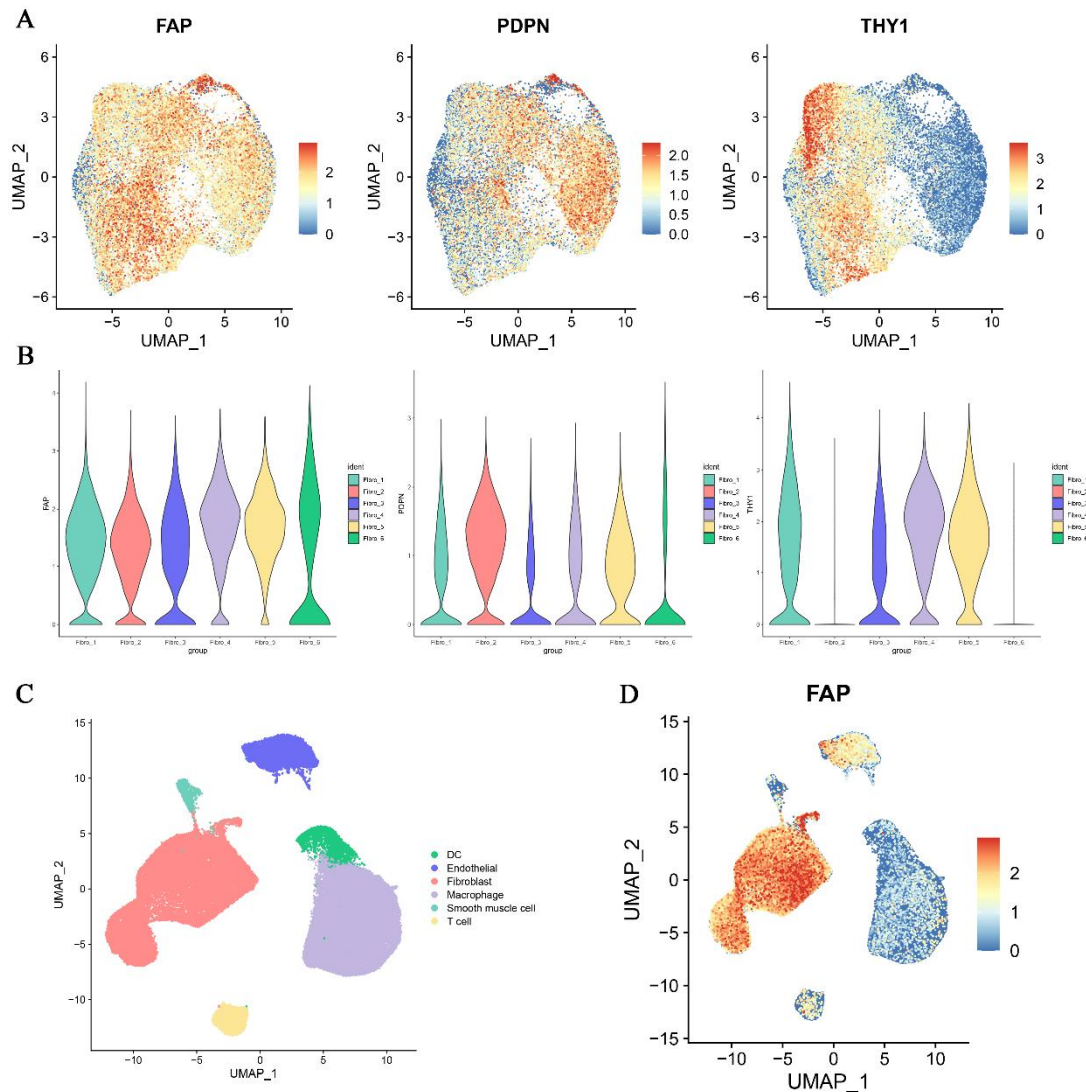

**Fig. S1.**

**Definition of fibroblasts based on single-cell atlas. (A)** Feature plot showing the expression of fibroblast marker genes (FAP, PDPN, THY1) in shoulder capsular fibroblasts. **(B)** Violin plots illustrating the expression of fibroblast marker genes across fibroblast subsets in shoulder capsular tissues. **(C)** Feature plot displaying FAP expression across different cell types. **(D)** UMAP visualization of the major cell types identified. The general identity of each cell type is indicated on the right.

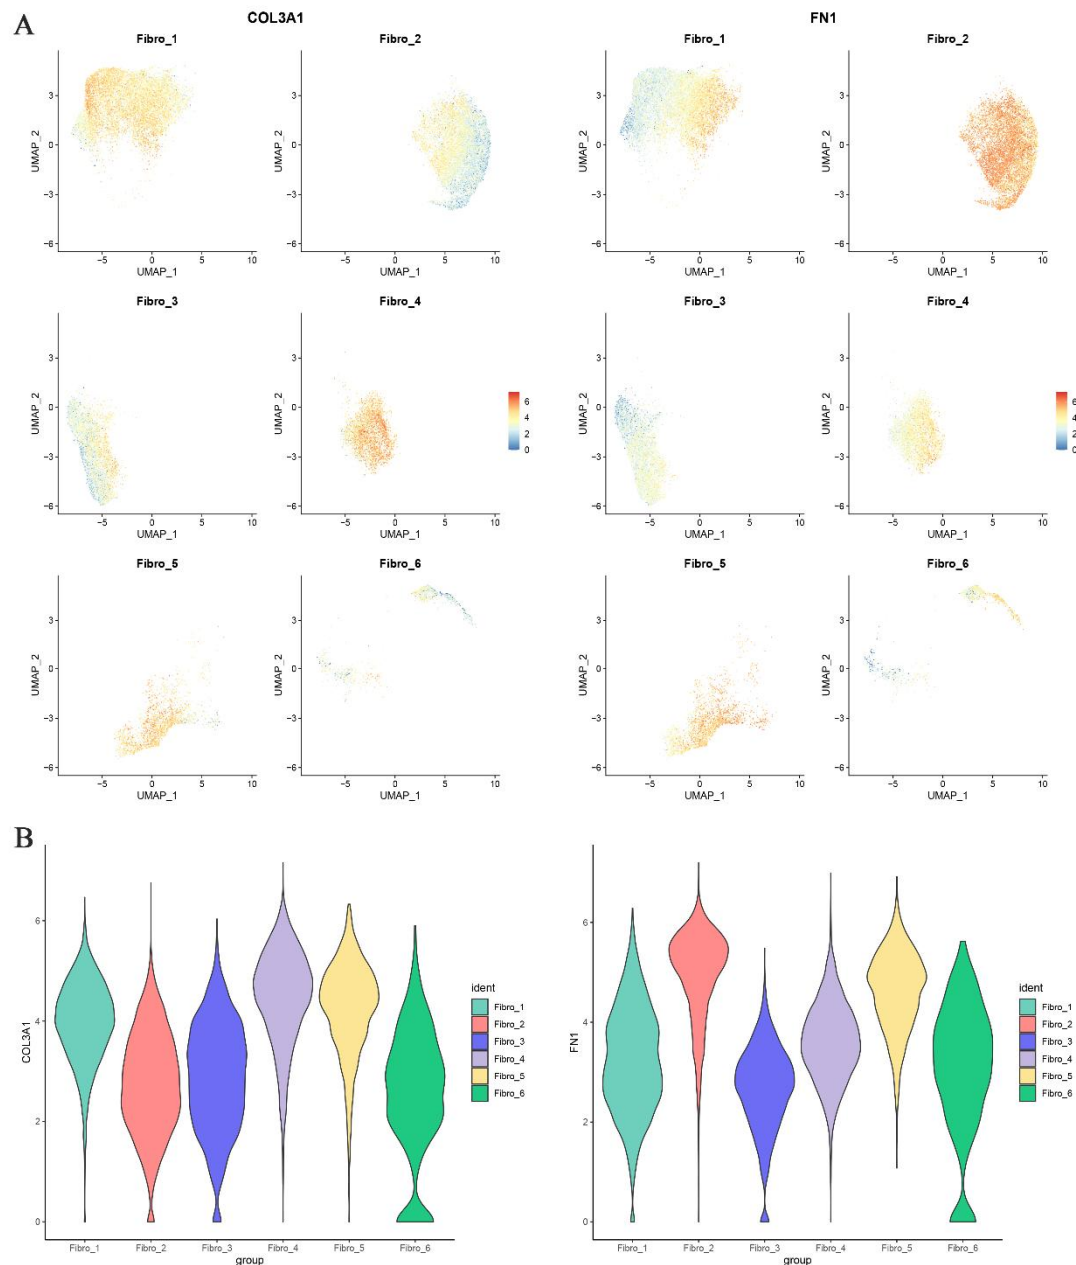

**Fig. S2.**

**Expression of extracellular matrix-related genes in fibroblast subsets. (A)** Feature plot showing the expression of extracellular matrix-related genes across fibroblast subsets. **(B)** Violin plots illustrating the expression of extracellular matrix-related genes in fibroblast subsets.

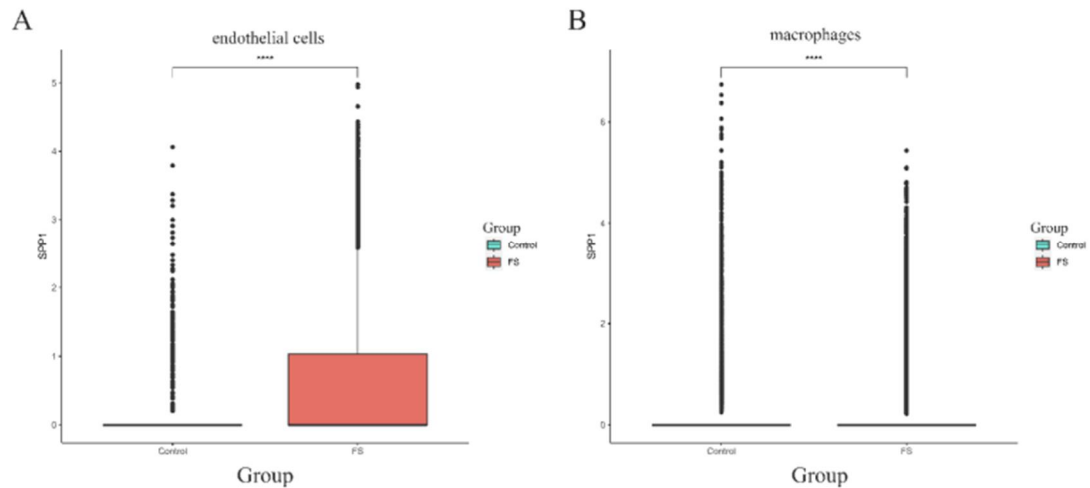

Fig. S3.

**Expression of SPP1 in endothelial cells and macrophages in frozen shoulder and control tissues. (A)** Box plot showing SPP1 expression in endothelial cells from FS and control tissues. Two-sided unpaired t-test, \*\*\*\*P < 0.0001. **(B)** Box plot showing SPP1 expression in macrophages from FS and control tissues. Two-sided unpaired t-test, \*\*\*\*P < 0.0001.

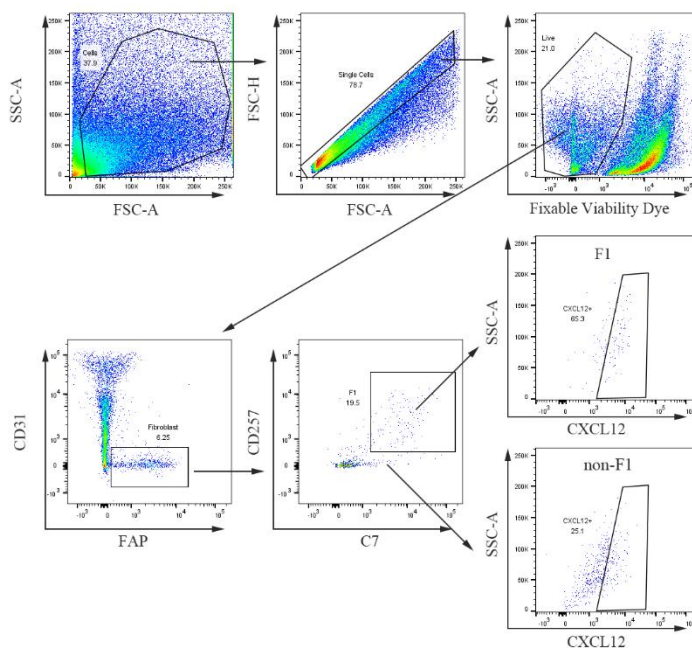

Fig. S4.

**Gating strategy for detection of CXCL12 expression in fibroblasts.**





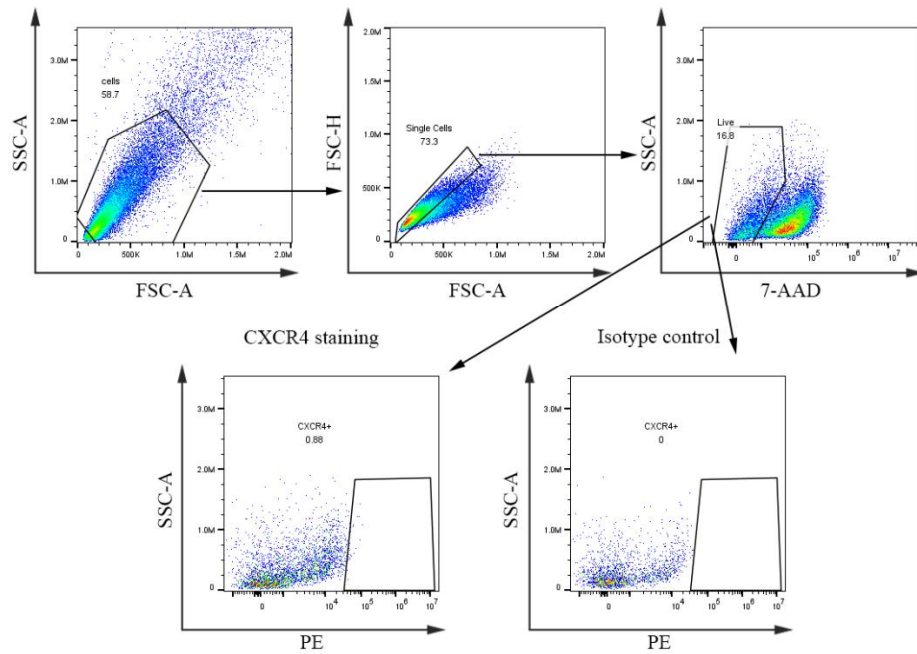

**Fig. S5.**

**Gating strategy for detection of CXCR4 expression in fibroblasts.**

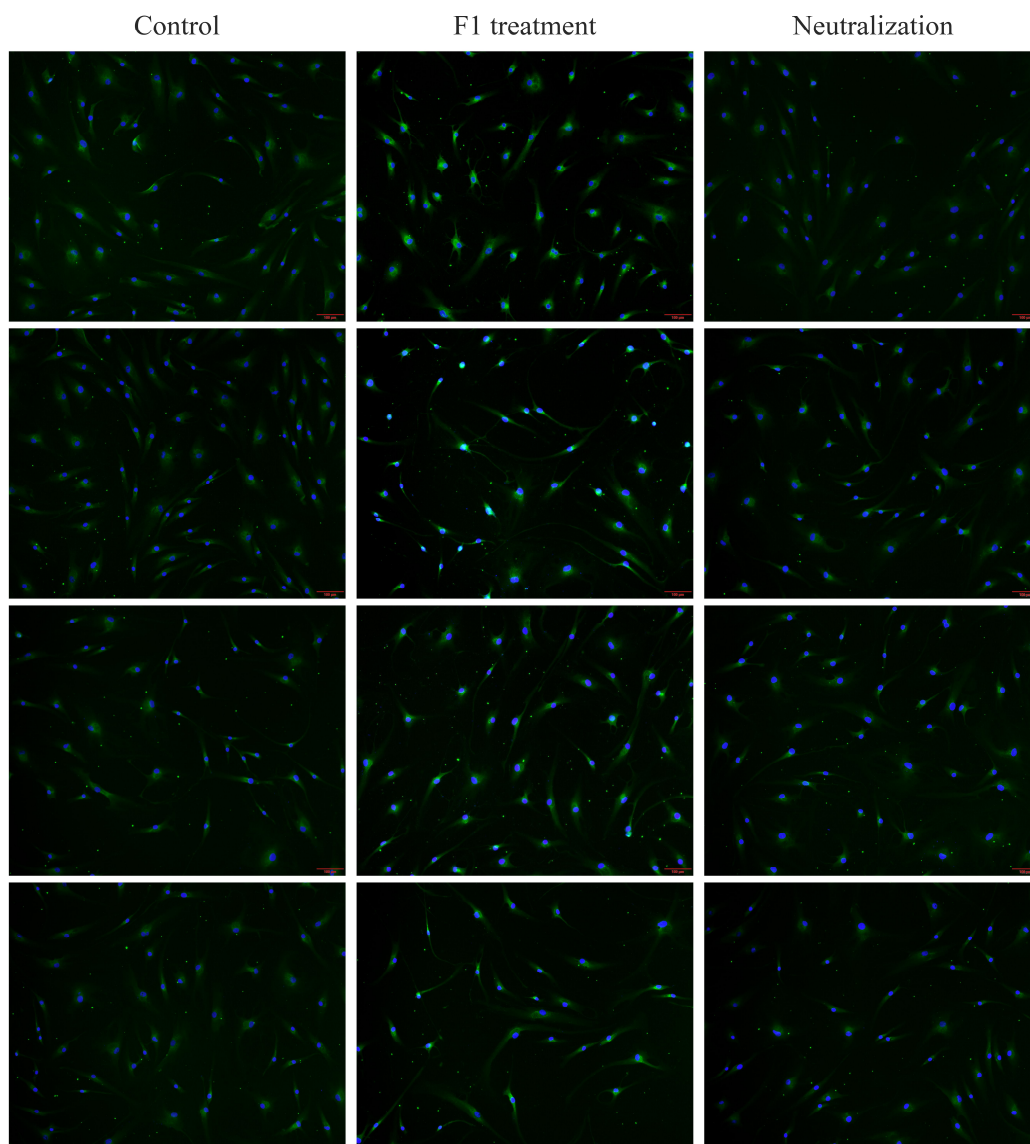

**Fig. S6.**

**Expression of COL3A1 in fibroblasts treated with CXCL12 neutraligand (LIT-927).**

Immunofluorescence staining of COL3A1 (green) in non-F1 fibroblasts treated with normal culture medium, the supernatant of F1 fibroblasts, or the supernatant of F1 fibroblasts with 100 ng/ml LIT-927. Scale bar = 100  $\mu$ m. Experiments were repeated four times with fibroblasts from four different donors.

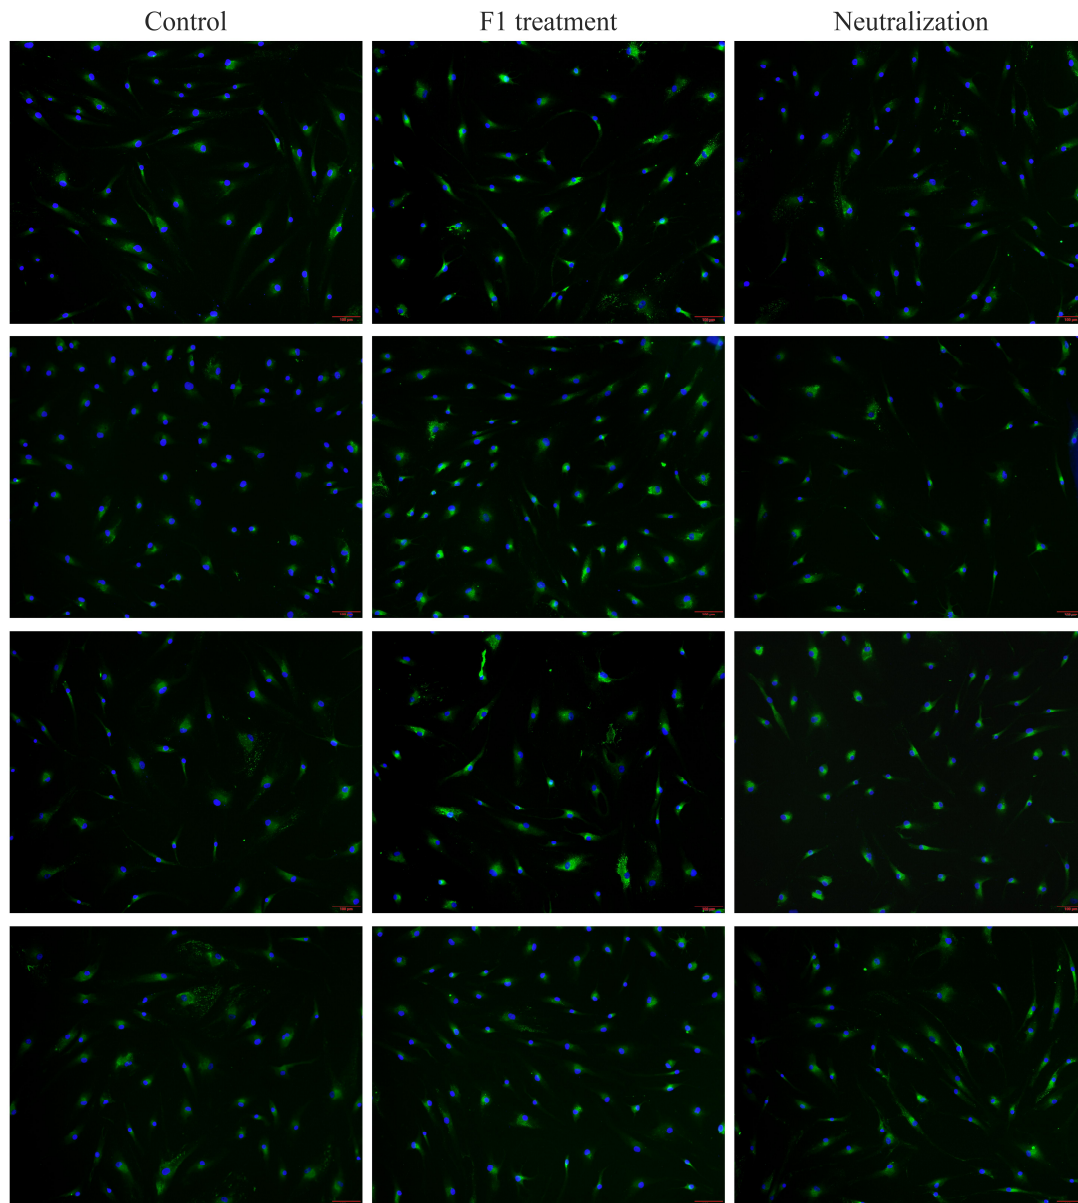

**Fig. S7.**

**Expression of FN1 in fibroblasts treated with CXCL12 neutraligand (LIT-927).**

Immunofluorescence staining of FN1 (green) in non-F1 fibroblasts treated with normal culture medium, the supernatant of F1 fibroblasts, or the supernatant of F1 fibroblasts with 100 ng/ml LIT-927. Scale bar = 100 µm. Experiments were repeated four times with fibroblasts from four different donors.

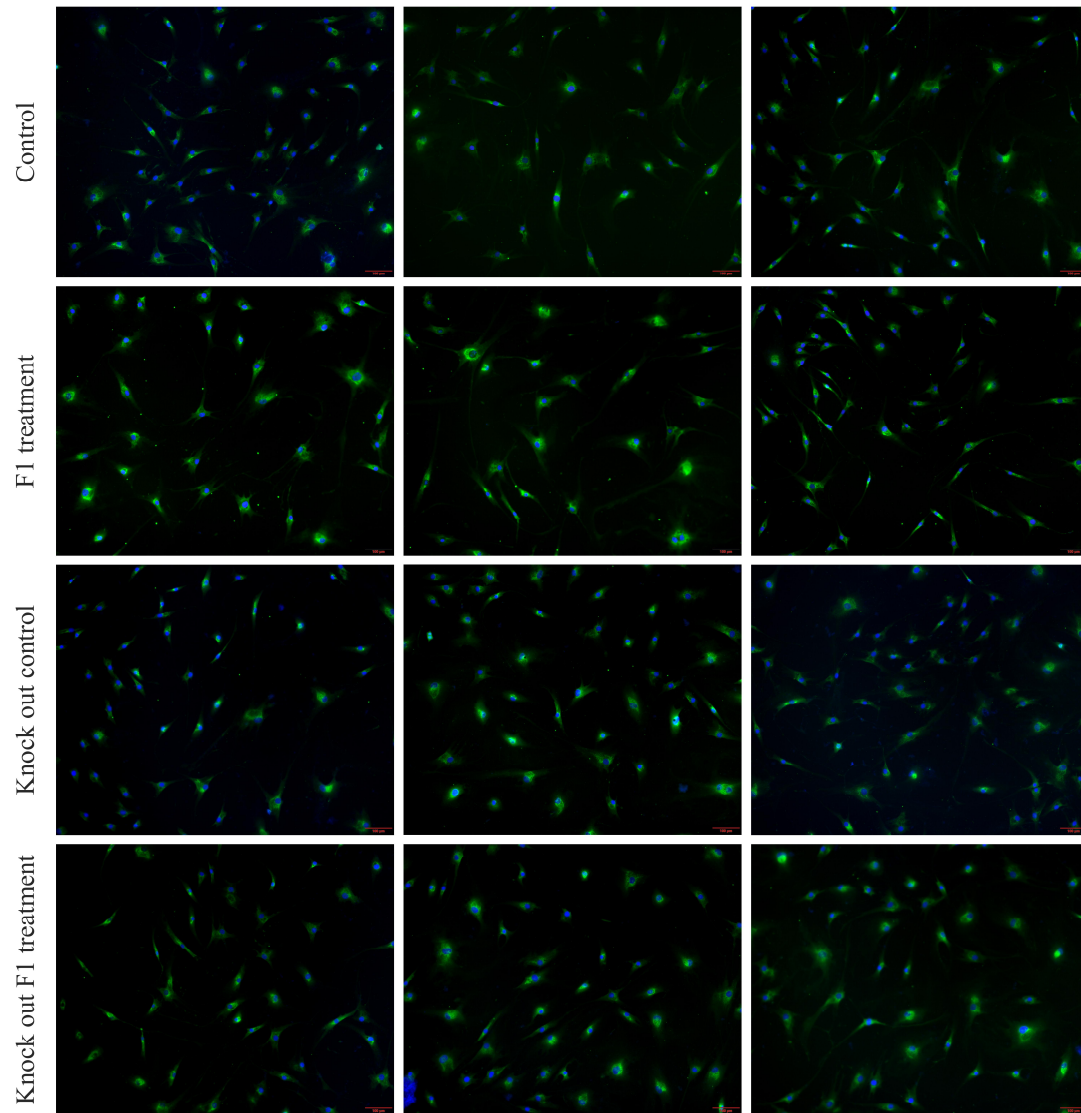

**Fig. S8.**

**Expression of COL3A1 in ACKR3-knockout fibroblasts.** Immunofluorescence staining of COL3A1 (green) in non-F1 fibroblasts and ACKR3-knockout non-F1 fibroblasts treated with normal culture medium or the supernatant of F1 fibroblasts. Scale bar = 100  $\mu$ m. Experiments were repeated three times with fibroblasts from three different donors.



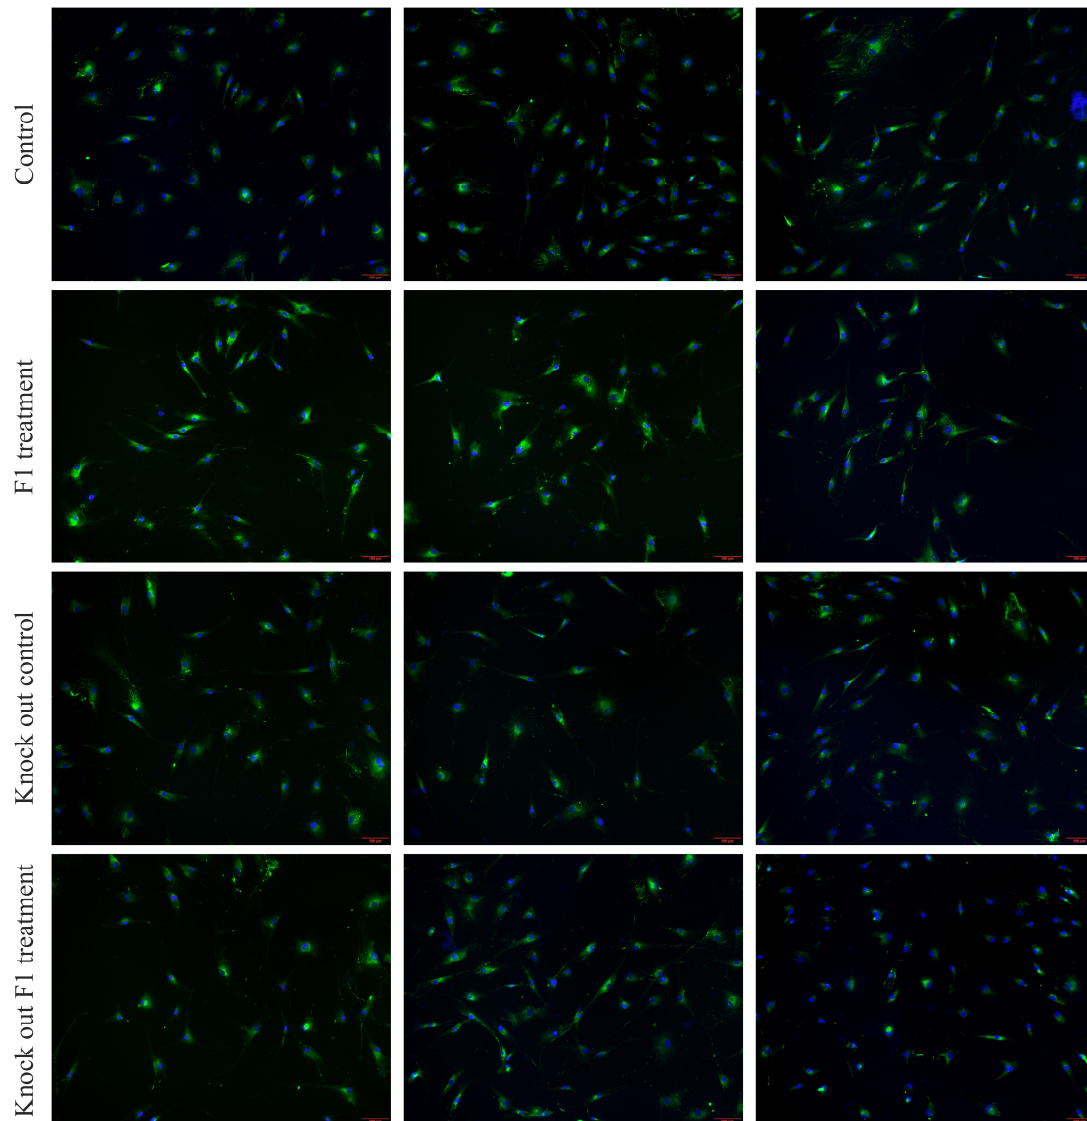

**Fig. S9.**

**Expression of FN1 in ACKR3-knockout fibroblasts.** Immunofluorescence staining of FN1 (green) in non-F1 fibroblasts and ACKR3-knockout non-F1 fibroblasts treated with normal culture medium or the supernatant of F1 fibroblasts. Scale bar = 100  $\mu$ m. Experiments were repeated three times with fibroblasts from three different donors.

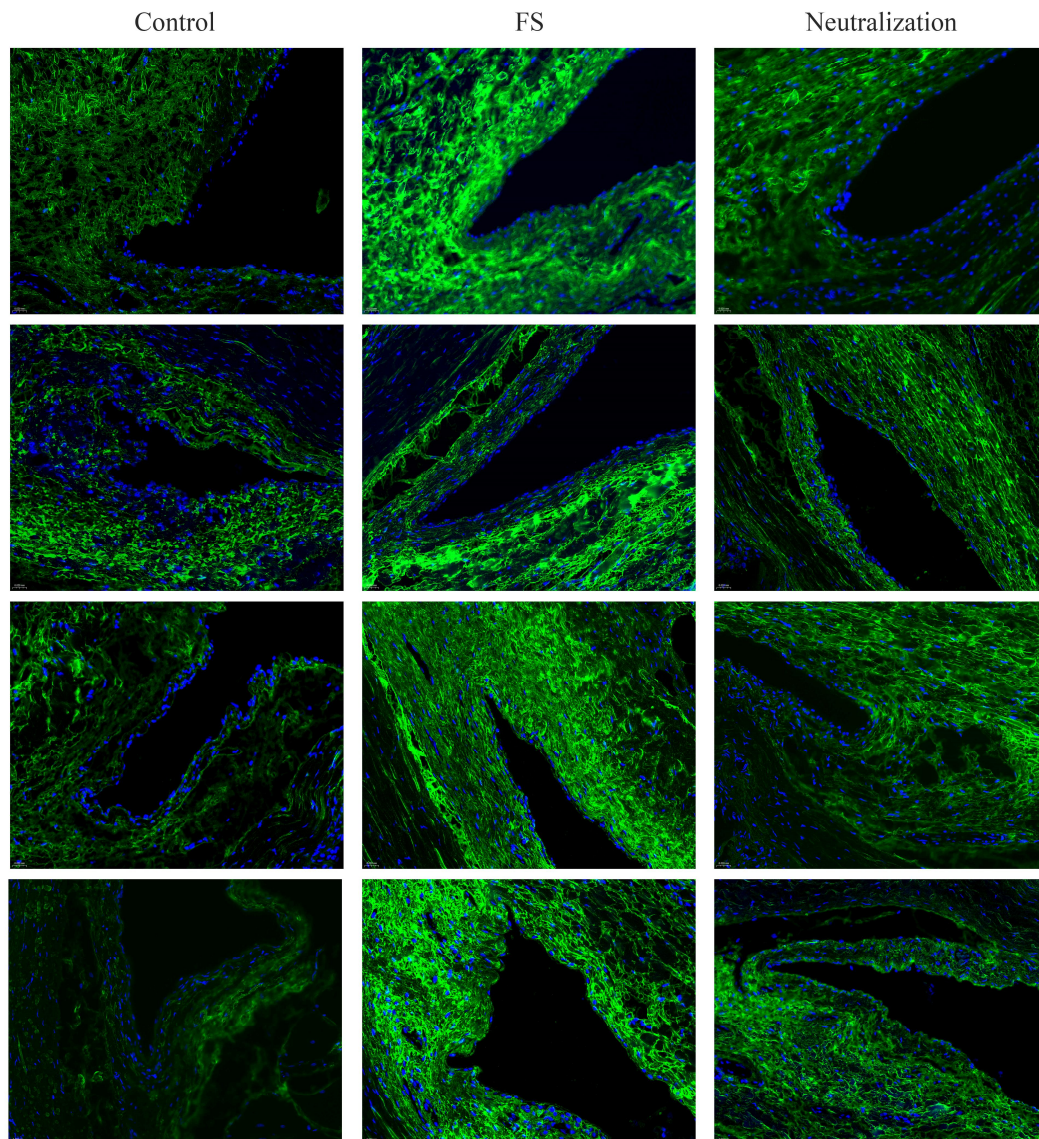

**Fig. S10.**

**Expression of COL3A1 in rat model.** Immunofluorescence staining of COL3A1 (green) in rat models groups: Control, FS, and Neutralization, scale bar = 20  $\mu$ m. The experiments were repeated four times with four different rats in each group.



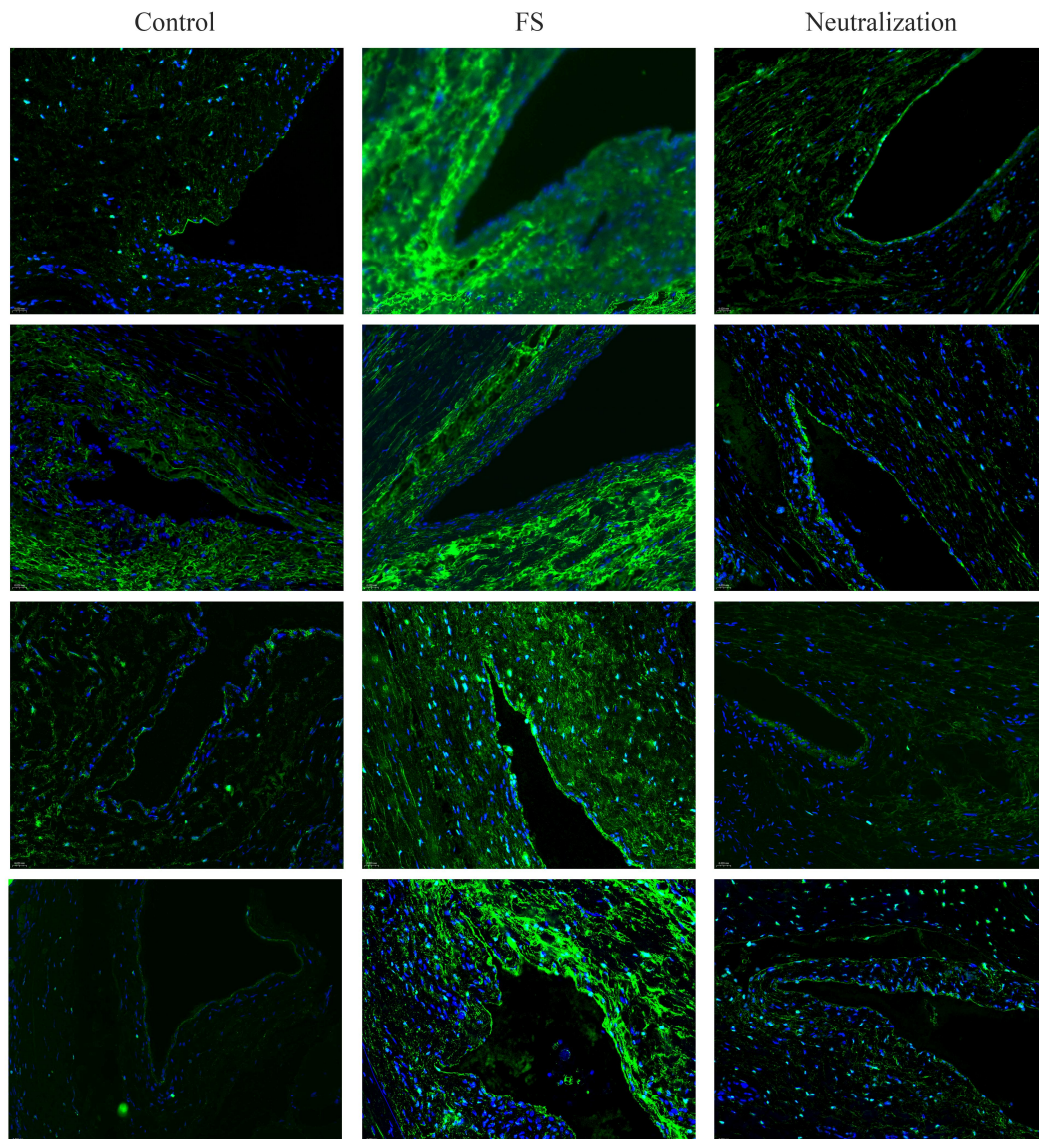

**Fig. S11.**

**Expression of FN1 in rat model.** Immunofluorescence staining of FN1 (green) in rat models groups: Control, FS, and Neutralization, scale bar = 20  $\mu$ m. The experiments were repeated four times with four different rats in each group.



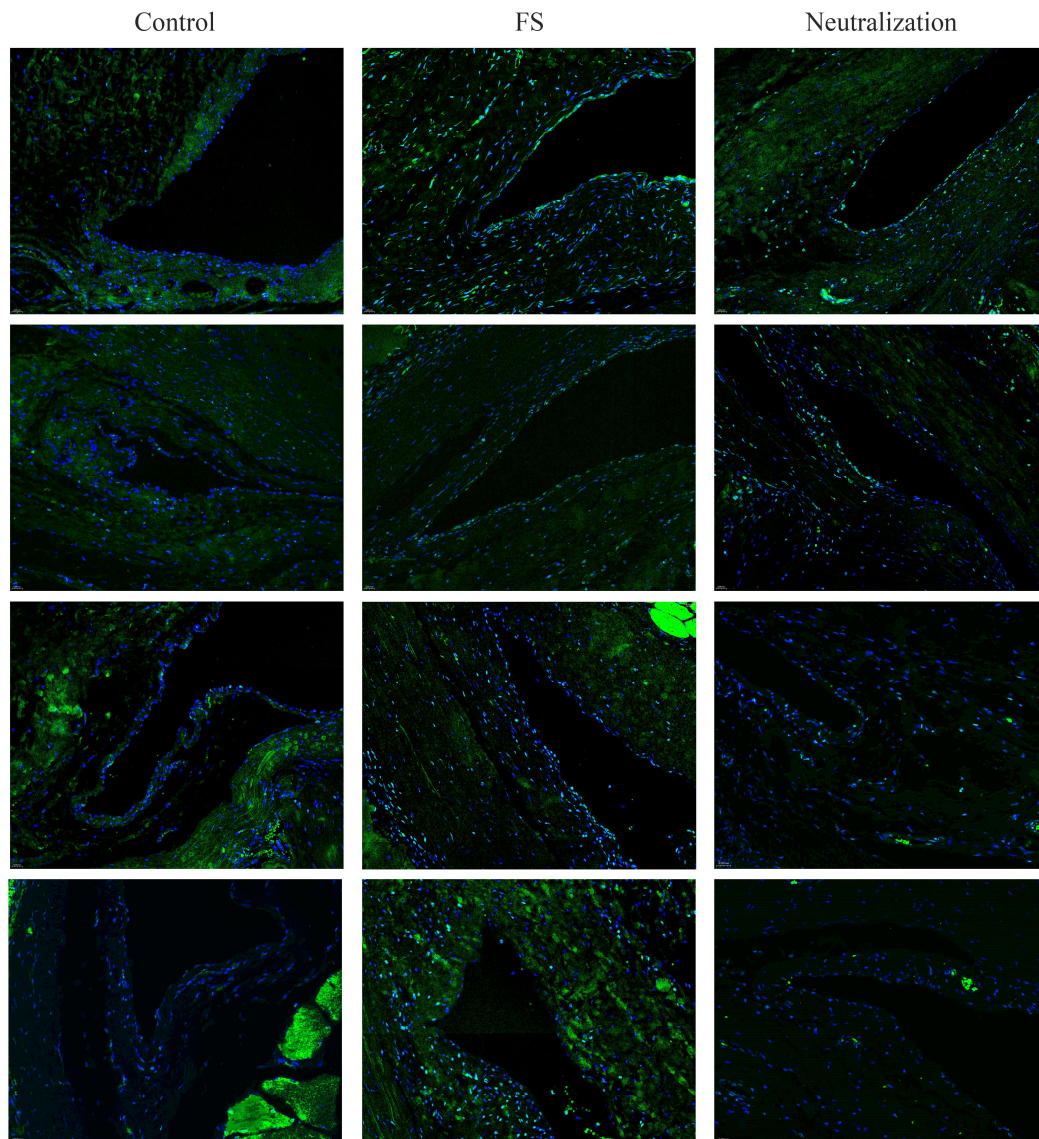

**Fig. S12.**

**Expression of MMP1 in rat model.** Immunofluorescence staining of MMP1 (green) in rat models groups: Control, FS, and Neutralization, scale bar = 20  $\mu$ m. The experiments were repeated four times with four different rats in each group.

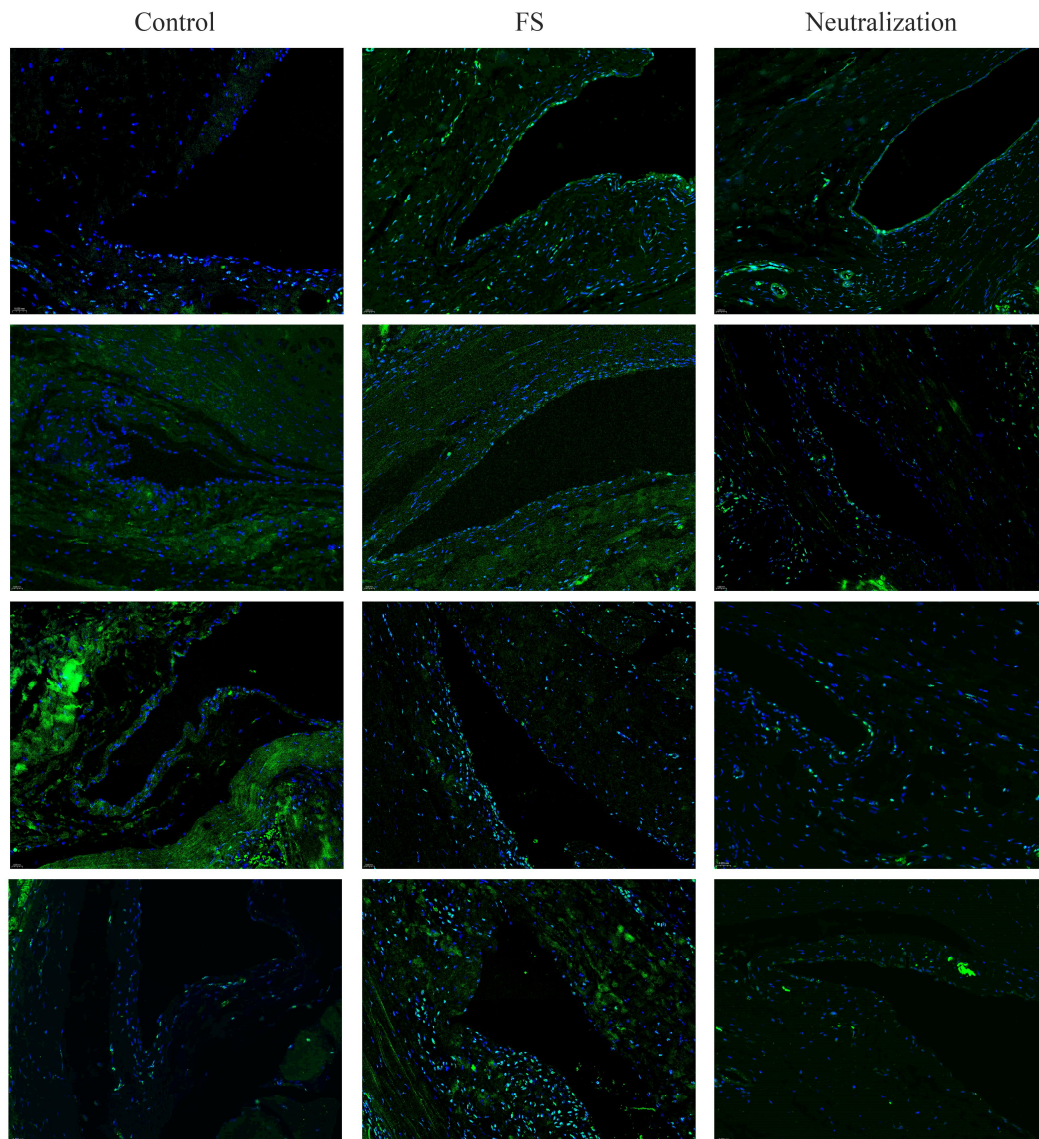

**Fig. S13.**

**Expression of MMP3 in rat model.** Immunofluorescence staining of MMP3 (green) in rat models groups: Control, FS, and Neutralization, scale bar = 20  $\mu$ m. The experiments were repeated four times with four different rats in each group.



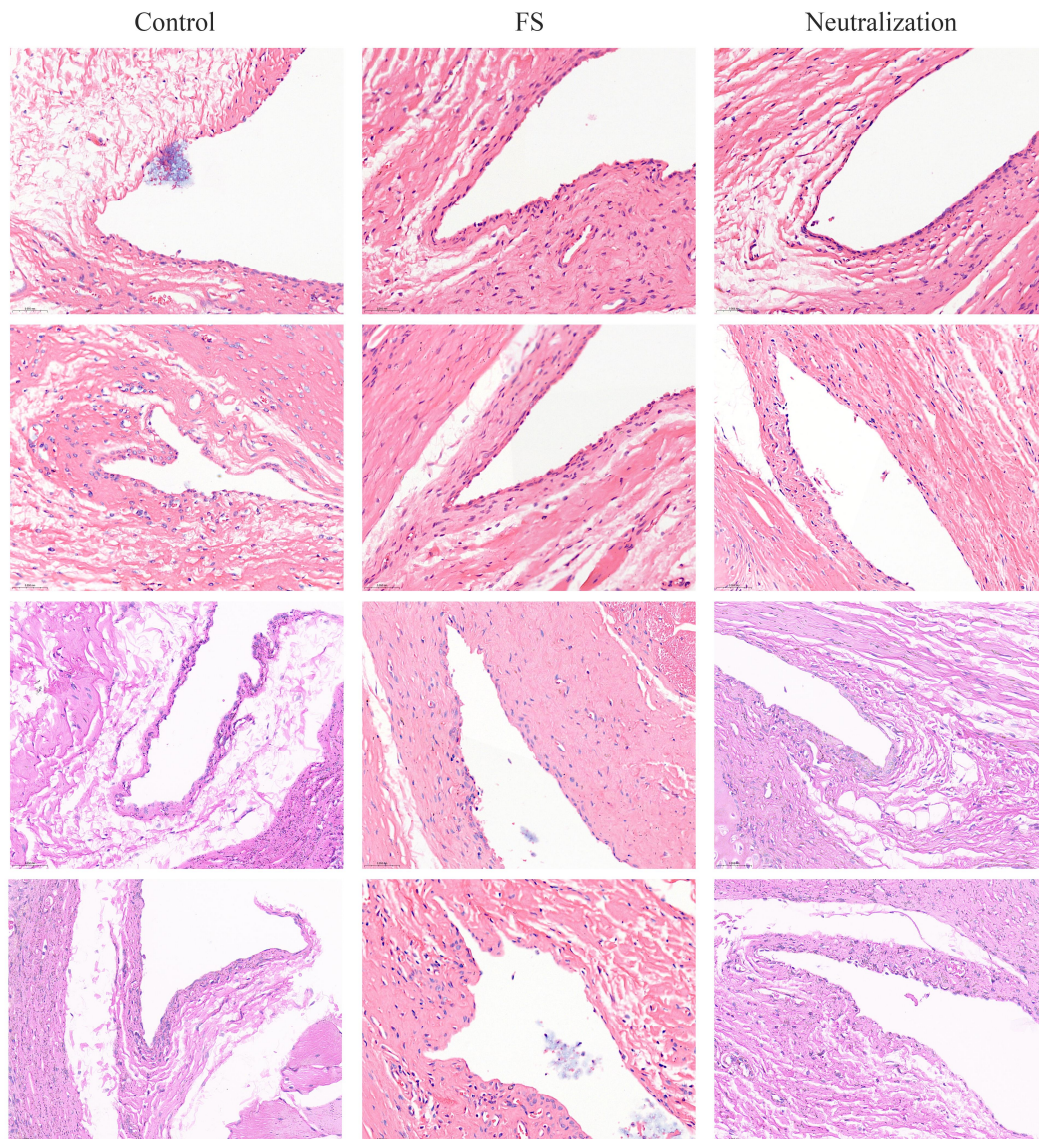

**Fig. S14.**

**Haematoxylin & Eosin (H&E) staining of the rat shoulder capsule.** H&E staining of the rat shoulder capsule in rat models groups: Control, FS, and Neutralization, scale bar = 50  $\mu$ m. The experiments were repeated four times with four different rats in each group.

**Table S1.**  
**Information of FS and control donors whose biospecimens were used for scRNA-seq experiments.**

| Sample ID | Gender | Age | Sample ID | Gender | Age |
|-----------|--------|-----|-----------|--------|-----|
| FS.1      | F      | 60  | Control.1 | M      | 60  |
| FS.2      | F      | 53  | Control.2 | F      | 59  |
| FS.3      | M      | 62  | Control.3 | F      | 51  |

**Table S2.**  
**Information of FS and control donors whose biospecimens were used for**  
**immunohistochemistry (IHC) and histological characterization (Hematoxylin &**  
**Eosin staining and Masson' s trichrome staining).**

| Sample ID | Gender | Age | Experiment | Sample ID | Gender | Age | Experiment |
|-----------|--------|-----|------------|-----------|--------|-----|------------|
| FS.1      | F      | 73  | IHC        | Control.1 | M      | 56  | IHC        |
| FS.2      | F      | 69  | IHC        | Control.2 | F      | 64  | IHC        |
| FS.3      | M      | 64  | IHC        | Control.3 | F      | 61  | IHC        |
| FS.4      | F      | 57  | IHC        | Control.4 | M      | 63  | IHC        |
| FS.5      | F      | 58  | histology  | Control.5 | F      | 48  | histology  |

120 **Table S3.**  
 121 **Information of FS donors whose biospecimens were used for CXCL12 stimulation**  
 122 **and flow cytometry analysis of CXCR4.**

| Sample ID | Gender | Age |
|-----------|--------|-----|
| FS.1      | M      | 48  |
| FS.2      | F      | 46  |
| FS.3      | F      | 61  |
| FS.4      | M      | 61  |

123

**Table S4.**  
**Information of FS and control donors whose biospecimens were used for WB of**  
**ACKR3.**

| Sample ID | Gender | Age | Sample ID | Gender | Age |
|-----------|--------|-----|-----------|--------|-----|
| FS.1      | F      | 61  | Control.1 | M      | 65  |
| FS.2      | M      | 56  | Control.2 | F      | 62  |
| FS.3      | F      | 68  | Control.3 | F      | 63  |

**Table S5.**  
**Information of FS and control donors whose biospecimens were used for flow cytometry analysis.**

| Sample ID | Gender | Age | Sample ID | Gender | Age |
|-----------|--------|-----|-----------|--------|-----|
| FS.1      | F      | 59  | Control.1 | M      | 50  |
| FS.2      | F      | 51  | Control.2 | F      | 61  |
| FS.3      | M      | 61  | Control.3 | F      | 59  |
| FS.4      | F      | 59  |           |        |     |



**Table S6.**  
**Information of FS and control donors whose biospecimens were used for Flow Cytometry Sorting.**

| Sample ID | Gender | Age | Experiment                               | Sample ID | Gender | Age | Experiment |
|-----------|--------|-----|------------------------------------------|-----------|--------|-----|------------|
| FS.1      | F      | 52  | CXCL12 Neutralization and Bulk RNA-Seq   | Control.1 | F      | 56  | -          |
| FS.2      | F      | 63  | CXCL12 Neutralization and Bulk RNA-Seq   | Control.2 | F      | 62  | -          |
| FS.3      | M      | 48  | CXCL12 Neutralization and Bulk RNA-Seq   | Control.3 | M      | 49  | -          |
| FS.4      | M      | 50  | CXCL12 Neutralization and ACKR3 Knockout | Control.4 | M      | 61  | -          |
| FS.5      | F      | 46  | ACKR3 Knockout                           | Control.5 | M      | 60  | -          |
| FS.6      | F      | 65  | ACKR3 Knockout                           | Control.6 | M      | 39  | -          |
