# Supplementary material for: CXCL12-ACKR3 Signaling Drives Fibrosis and Inflammation in Frozen Shoulder: A Single-Cell Guided Therapeutic Discovery
Source: Research Square preprint supplement (doi:10.21203/rs.3.rs-6289785/v1), 2025-04-10
Supplement: Supplementary file 2 [file a84b7d4de2e78878a1c74858.xlsx]

## Sheet: figure.3A
Quantitative data of MMP3, MMP1, COL3A1, and FN1 relative expression in FS fibroblasts with CXCL12 stimulation experiment.
Sample ID	MMP1	MMP3	COL3A1	FN1
C1	0.717	0.513	0.548	0.951
C2	1.083	0.431	0.809	0.845
C3	0.826	1.214	0.778	1.024
C4	1.163	0.922	1.006	0.783
T1	1.407	0.975	1.033	1.343
T2	1.278	1.103	1.194	0.968
T3	1.458	1.574	1.248	1.431
T4	2.121	1.278	2.216	1.075

## Sheet: figure.3D
Quantitative data of CXCL12-positive area percentages in control and FS tissues.
Sample ID	Group	CXCL12+ Area (%)
FS1	FS	5.758
FS2	FS	3.221
FS3	FS	3.2
FS4	FS	4.477
C1	Control	0.825
C2	Control	1.909
C3	Control	1.137
C4	Control	1.412

## Sheet: figure.3E
Quantitative data of CXCL12+ fibroblast percentages.
Sample ID	Group	CXCL12+ Fibroblasts (%)
FS1	FS	33
FS2	FS	18.3
FS3	FS	68.5
FS4	FS	58.9
C1	Control	8.18
C2	Control	10.8
C3	Control	6.25

## Sheet: figure.3H
Quantitative data of ACKR3 expression in FS and control fibroblasts.
Sample ID	Group	ACKR3 Expression
FS1	FS	0.826
FS2	FS	1.348
FS3	FS	0.728
C1	Control	0.868
C2	Control	0.607
C3	Control	0.743

## Sheet: figure.4A
Quantitative data of F1 subset percentages in FS and control tissues.
Sample ID	Group	F1 Subset (%)
FS1	FS	15.9
FS2	FS	23.7
FS3	FS	16.2
FS4	FS	33
FS5	FS	19.3
FS6	FS	32.7
C1	Control	8.45
C2	Control	11.9
C3	Control	5.85
C4	Control	6.42
C5	Control	5.8
C6	Control	8.17

## Sheet: figure.4B
Quantitative data of CXCL12+ percentages in F1 vs. non-F1 fibroblasts.
Subset	Sample ID	CXCL12+ (%)
F1 subset	F1.1	65.3
F1 subset	F1.2	38.6
F1 subset	F1.3	81.4
F1 subset	F1.4	64.6
Non-F1 subset	non-F1.1	25.1
Non-F1 subset	non-F1.2	13.2
Non-F1 subset	non-F1.3	58.9
Non-F1 subset	non-F1.4	53.8

## Sheet: figure.4E
Quantitative data of CXCL12 concentrations in F1 and non-F1 supernatants.
Subset	Sample ID	CXCL12 (ng/ml)	Mean ± SD
F1 subset	F1-1	79.553	75.96 ± 7.21
	F1-2	67.158
	F1-3	81.192
Non-F1 subset	non-F1-1	39.121	41.06 ± 7.16
	non-F1-2	34.861
	non-F1-3	49.191

## Sheet: figure.4F, G
Quantitative data of expression of MMP3, MMP1, COL3A1 and FN1 in non-F1 fibroblasts with neutralization experiment.
Treatment	Sample ID	MMP1	MMP3	COL3A1 (Mean Gray Value)	FN1 (Mean Gray Value)
Control	C1	0.846	0.2	1145.54	1467.21
Control	C2	0.527	0.438	1130.39	1276.58
Control	C3	1.333	0.211	1077.79	1210.62
Control	C4	0.54	0.286	1071.4	758.583
F1-treated	T1	1.403	0.412	1452.26	2075.44
F1-treated	T2	1.241	0.859	1445.91	1969.19
F1-treated	T3	2.111	0.43	1440.93	1950.58
F1-treated	T4	1.46	0.541	1408.95	1947.73
Neutralization	N1	0.558	0.267	1169.17	1351.66
Neutralization	N2	0.637	0.338	1125.97	1291.58
Neutralization	N3	1.027	0.211	1110.32	1211.9
Neutralization	N4	0.2	0.258	1001.52	892.156

## Sheet: figure.4I, K
Quantitative data of expression of MMP1, MMP3, COL3A1, FN1 and ACKR3 in non-F1 fibroblasts with ACKR3 knockout experiment.
Experimental Group	Sample ID	MMP1	MMP3	COL3A1 (Mean Gray Value)	FN1 (Mean Gray Value)	ACKR3
Control	C1	0.853	0.767	5177.18	3815.51	0.623
Control	C2	0.842	1.138	5153.59	3728.33	0.548
Control	C3	0.898	1.722	4906.73	3420.84	0.426
F1-treated	T1	2.478	3.76	5913.78	5913.78	0.516
F1-treated	T2	2.087	5.189	5839.45	5839.45	0.483
F1-treated	T3	2.375	5.967	5815.09	5815.09	0.51
ACKR3 knockout (K) control	K1	1.295	0.741	5281.8	5281.8	0.29
ACKR3 knockout (K) control	K2	0.714	1.717	5071.17	5071.17	0.291
ACKR3 knockout (K) control	K3	1.306	1.201	4826.84	4826.84	0.239
KO + Treatment	K+T1	0.802	1.013	5243.63	5243.63	0.36
KO + Treatment	K+T2	0.888	1.536	5046.46	5046.46	0.327
KO + Treatment	K+T3	1.033	1.194	4970.46	4970.46	0.303

## Sheet: figure.5B
Quantitative data of expression of MMP1, MMP3, COL3A1 and FN1 in rat model.
Group	Sample ID	MMP1+ Cells (%)	MMP3+ Cells (%)	COL3A1 (Mean Gray Value)	FN1 (Mean Gray Value)
Control	C1	11.74	15.21	30.279	24.706
Control	C2	7.98	4.14	31.198	32.532
Control	C3	8.53	5.31	29.444	29.771
Control	C4	12.4	15.44	19.434	15.209
FS Model	FS1	30.06	22.17	63.101	54.009
FS Model	FS2	30.94	29.51	59.309	51.498
FS Model	FS3	26.71	26.4	52.91	51.624
FS Model	FS4	22.95	40.38	62.53	68.852
Neutralization	N1	18.71	11.43	30.715	27.113
Neutralization	N2	20.22	12.88	43.213	38.899
Neutralization	N3	15.86	17	33.489	15.556
Neutralization	N4	15	14.85	40.186	42.314
